# Supplementary material for: Network topology and property studies for two binodal self-penetrated coordination polymers
Source: Royal Society of Chemistry journal article supplement (doi:10.1039/b919676p), 2009-10-08
Supplement: b919676p.pdf [file b919676p.pdf]

## Network topology and property studies for two binodal self-penetrated coordination polymers

Pang-kuan Chen, Yan Qi, Yun-xia Che and Ji-min Zheng

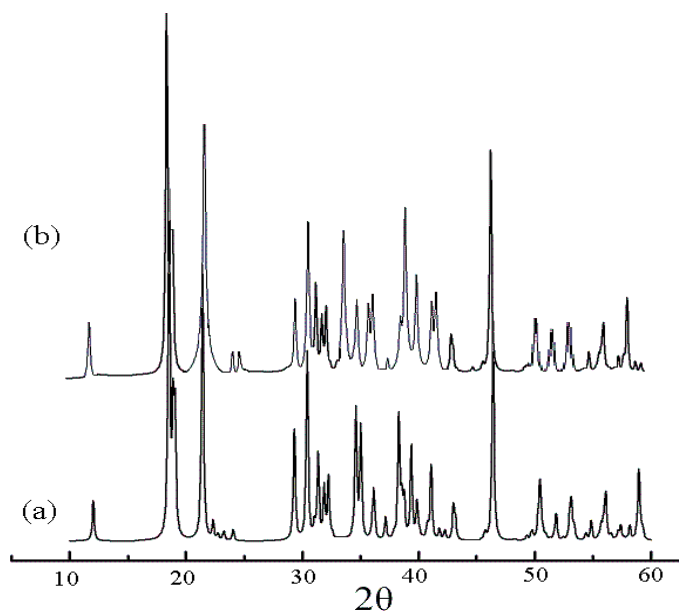

**Fig. S1** The X-ray powder diffraction (XRPD) patterns for **1** at room temperature: (a) simulated; (b) experimental.

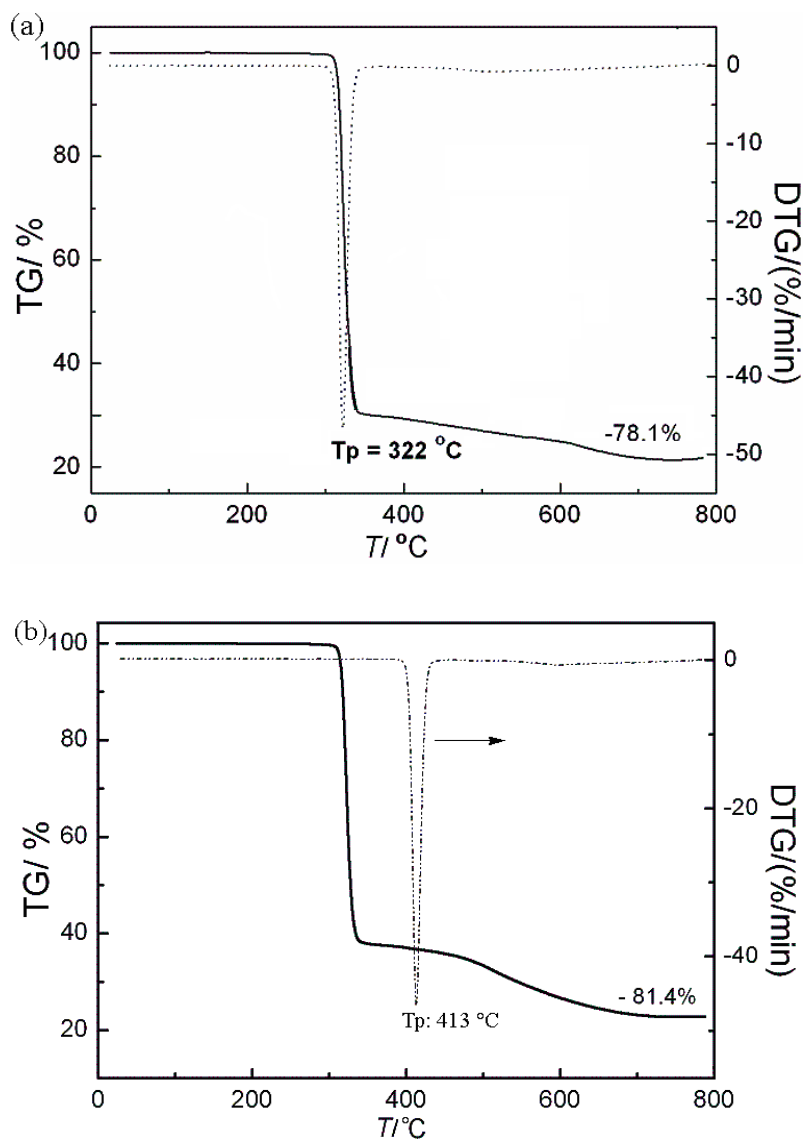

**Fig. S2** TGA curves at a heating rate of  $10^\circ\text{C}/\text{min}$ . Real line: TG; broken line: DTG. (a): **1**; (b): **2**.

**Table S3** Selected bond lengths [Å] and angles [°] in **1** and **2**

| Complex 1           |            |                     |            |
|---------------------|------------|---------------------|------------|
| Co(1)-O(4)          | 1.956(2)   | Co(1)-O(5)          | 1.957(2)   |
| Co(1)-O(6)#1        | 1.968(2)   | Co(1)-O(3)#1        | 1.976(2)   |
| Co(1)-N(3)#2        | 2.150(3)   | Co(1)-Co(1)#1       | 2.6456(6)  |
| Cu(1)-N(2)          | 1.917(2)   | Cu(1)-N(1)          | 1.920(2)   |
| Cu(1)-O(1)          | 2.164(2)   | O(4)-Co(1)-O(5)     | 89.99(11)  |
| N(2)-Cu(1)-N(1)     | 148.27(12) | N(2)-Cu(1)-O(1)     | 105.56(11) |
| N(1)-Cu(1)-O(1)     | 104.06(11) |                     |            |
| Complex 2           |            |                     |            |
| Co(1)-O(2)          | 1.983(2)   | Co(1)-N(4)#3        | 2.041(3)   |
| Co(1)-N(1)          | 2.042(3)   | Co(1)-O(3)#4        | 2.049(2)   |
| Co(1)-O(4)#4        | 2.332(2)   | N(4)-Co(1)#5        | 2.041(3)   |
| O(3)-Co(1)#2        | 2.049(2)   | O(4)-Co(1)#2        | 2.332(2)   |
| O(2)-Co(1)-N(4)#3   | 94.53(10)  | O(2)-Co(1)-N(1)     | 109.86(10) |
| N(4)#3-Co(1)-N(1)   | 104.99(11) | O(2)-Co(1)-O(3)#4   | 107.13(10) |
| N(4)#3-Co(1)-O(3)#4 | 107.76(11) | N(1)-Co(1)-O(3)#4   | 127.55(11) |
| O(2)-Co(1)-O(4)#4   | 165.80(9)  | N(4)#3-Co(1)-O(4)#4 | 86.60(10)  |
| N(1)-Co(1)-O(4)#4   | 83.39(10)  | O(3)#4-Co(1)-O(4)#4 | 59.29(8)   |
